# 1 Bacteria are required for 2 regeneration of the *Xenopus* tadpole 3 tail

4 Thomas F. Bishop<sup>1§</sup> and Caroline W. Beck<sup>1\*</sup>

\*For correspondence:

[caroline.beck@otago.ac.nz](mailto:caroline.beck@otago.ac.nz) (CWB);  
[tfbishop@ucdavis.edu](mailto:tfbishop@ucdavis.edu) (TFB)

<sup>1</sup>Department of Zoology, University of Otago, PO Box 56, Dunedin, New Zealand

<sup>§</sup>Department of  
Animal Science University of  
California Davis, CA 95616 USA

6 **Abstract** The impressive regenerative capabilities of amphibians have been studied for over a  
7 century. Although we have learnt a great deal about regenerative processes, the factors  
8 responsible for the initiation of regeneration have remained elusive. A previous study implicated  
9 reactive oxygen species (ROS) and the ROS-generator, NADPH oxidase (Nox), in *Xenopus* tadpole tail  
10 regeneration. In this study we suggest that Nox is expressed as a consequence of NF- $\kappa$ B  
11 transcription factor activity and that ROS produced by Nox, in turn, help to maintain the activity of  
12 NF- $\kappa$ B, forming a positive-feedback loop. Microorganisms were found to be required for  
13 regeneration through binding to toll-like receptors (TLR). NF- $\kappa$ B is a downstream component of TLR  
14 pathways and its activation through TLR stimulation could jump-start the positive-feedback loop.  
15 These findings provide potential targets for the activation of regeneration in non-regenerative  
16 animals.  
17

## 18 Introduction

19 Amphibians have remarkable regenerative capabilities, but the mechanisms they use to initiate and  
20 maintain regeneration are still largely unknown. It has been previously shown by Love et al (2013)  
21 that reactive oxygen species (ROS) are continually produced and required for successful tadpole  
22 tail regeneration *Love et al. (2013)*. Production of ROS and tadpole tail regeneration are prevented  
23 by NADPH oxidase (Nox) inhibitors, suggesting Nox complexes as the source of ROS *Love et al.*  
24 *(2013)*. However, the role of ROS and the mechanism of their sustained production throughout  
25 regeneration were uncertain.  
26

27 NF- $\kappa$ B is a rapid-acting transcription factor with the potential to dramatically alter the activity and  
28 function of a cell *Sun and Andersson (2002)*. NF- $\kappa$ B is necessary for maintaining the undifferentiated  
29 state of human embryonic stem cells *Deng et al. (2016)*, human induced pluripotent stem cells  
30 *Takase et al. (2013)* and mesenchymal stem cells *Chang et al. (2013)*, suggesting it could be involved  
31 in maintaining the de-differentiated state of regeneration blastema cells. In the absence of an  
32 activating signal, NF- $\kappa$ B is sequestered in the cytoplasm by I $\kappa$ B (inhibitor of NF- $\kappa$ B), preventing its  
33 nuclear localisation and activity. The I $\kappa$ B kinase (IKK) complex inhibits I $\kappa$ B in response to multiple  
34 extracellular stimuli, but ROS can also inhibit I $\kappa$ B *Reuter et al. (2010)*. Nuclear NF- $\kappa$ B directly  
35 activates transcription of several genes encoding Nox proteins *Manea et al. (2010)*; *Morgan and Liu*  
36 *(2011)*, so could thereby facilitate ROS production.

37 Here, we suggest that a positive-feedback loop involving NF- $\kappa$ B could maintain ROS levels  
38 in regenerating amphibian appendages. Intracellular ROS can inhibit I $\kappa$ B, which would result  
39 in increased NF- $\kappa$ B activity. Active NF- $\kappa$ B could then facilitate the continual production of ROS

40 by activating the transcription of Nox-encoding genes. Intriguingly, we also demonstrate that  
41 microorganisms can play a role in the initiation of tadpole tail regeneration. Microorganisms present  
42 on the skin of tadpoles offer sources of ligands for toll-like receptor (TLR) pathway activation and  
43 consequently, IKK complex activity. We suggest that this mechanism leads to NF- $\kappa$ B activation at  
44 the wound site. Finally, we provide evidence that continual expression of the genes encoding Nox4  
45 in limb bud blastema cells and Nox2 in professional phagocytes correlates with sustained NF- $\kappa$ B  
46 activity.

## 47 Results

### 48 **Nox activity is required and NF- $\kappa$ B is activated within hours of amputation**

49 It has been previously shown that ROS concentration greatly increases around the site of injury  
50 within 20 minutes after tadpole tail amputation, and is maintained at high levels throughout the  
51 process of regeneration *Love et al. (2013)*. Raising tadpoles in the presence of the Nox inhibitor,  
52 DPI, for 3 days following tail amputation prevents regeneration *Love et al. (2013)*. This shows that  
53 ROS are important for regeneration, but does not differentiate between the initial burst and the  
54 maintenance of ROS production. To see if ROS production was required during the initial hours  
55 following amputation, shorter DPI treatment durations were tested. Treatment with DPI beginning  
56 at 1 hour before amputation and terminating 1 hour afterwards had no effect on regeneration.  
57 However, tadpole tail regeneration was significantly reduced following DPI treatment for 3, 6 and  
58 12 hours post-amputation (hpa) (Fig 1a). Longer treatments resulted in greater reductions in  
59 regeneration, with post-amputation treatments of 6 and 12 hours reducing regeneration scores to  
60 less than half of their respective controls. This confirms the previous finding that Nox activity is  
61 required for regeneration of the tail as early as 3 hours after tail amputation in *Xenopus Love et al.*  
62 *(2013)*, and further identifies the early role of Nox in sustaining ROS levels.

63 Inactive NF- $\kappa$ B is sequestered in the cytoplasm and translocates to the nucleus upon activation.  
64 A Western blot of nuclear and cytoplasmic protein extracts from tadpole tail sections showed RelA  
65 (p65 subunit of NF- $\kappa$ B) predominantly in the cytoplasm of uninjured tails and in the nucleus at 1  
66 hpa (Fig 1b). By 3 hpa, it was once again located predominantly in the cytoplasm. The initial surge of  
67 ROS, where ROS were observed far beyond the amputation plane *Love et al. (2013)*, could therefore  
68 account for the rapid NF- $\kappa$ B translocation to the nucleus, suggesting that this key transcription  
69 factor is activated rapidly upon tail amputation. In the presence of DPI (Fig 1b), RelA was detected  
70 predominantly in the cytoplasmic fraction at 1 hpa, suggesting the involvement of ROS produced  
71 by Nox. The initial, widespread NF- $\kappa$ B translocation may not be essential as DPI did not prevent  
72 regeneration within the time-frame of this event (Fig 1a).

73 The Western blots were performed with protein extracts from large tail sections and do not  
74 have the sensitivity to detect NF- $\kappa$ B activity immediately adjacent to the amputation plane. The  
75 direct NF- $\kappa$ B target and marker of inflammation *Lim et al. (2001)*, *cox2*, is expressed along the  
76 amputation plane at 6 hpa and along the edge of tadpole tail regenerates throughout regeneration  
77 (Fig 1c). Expression of *cox2* was strong in stage 51 (regenerative) hindlimbs at 6 hpa and 1 day  
78 post-amputation (dpa) in the tissue beneath the wound epithelium, but was not observed at 2  
79 dpa (Fig 1d). *Xenopus* limbs regenerate well early in development, but this capacity becomes lost  
80 as development progresses *Dent (1962)*, allowing regenerative competency and incompetency to  
81 be studied in the same appendage (Fig 1e). Expression along the amputation plane at 1 dpa was  
82 reduced with decreasing regenerative capacity (Fig 1d, e). These data indicate a correlation between  
83 amputation plane expression of the NF- $\kappa$ B target gene *cox2* in regenerating tails and limbs with  
84 eventual regenerative success.

85 **NF- $\kappa$ B direct targets Nox2 and Nox4 are rapidly up-regulated in regenerating hindlimbs**  
86 NF- $\kappa$ B also directly activates *nox1*, *nox2* and *nox4* *Manea et al. (2010)*; *Morgan and Liu (2011)*, which  
87 encode the catalytic subunit of different Nox complexes *Miller et al. (2006)*. Since Nox is required  
88 for tail regeneration *Love et al. (2013)* and the NF- $\kappa$ B target, *cox2*, is expressed in regenerating  
89 tails and hindlimbs, it was hypothesised that at least one of these NF- $\kappa$ B-targeted *nox* genes  
90 would also be expressed during regeneration. Indeed, both *nox2* and *nox4* were expressed in  
91 regenerating stage 51 hindlimbs at all timepoints (Fig 2) spanning the timeframe of blastema  
92 formation *Pearl et al. (2008)*. Expression of *nox2* was punctate and comparable to the previously  
93 described distribution of neutrophils and macrophages in regenerating hindlimbs *Mescher et al.*  
94 *(2013)*, consistent with its expression being confined to these cells. Expression of *nox4* was observed  
95 around the injury and throughout the regenerate. No obvious expression of *nox1* was observed  
96 at any timepoints. These results suggest Nox2 and Nox4 as drivers of ROS production during  
97 regeneration. Preventing inflammatory cell recruitment to the injury does not significantly alter  
98 ROS production in regenerating tadpole tails *Love et al. (2013)*, suggesting that Nox2 does not  
99 substantially contribute to overall ROS production during tail regeneration.

### 100 **Resident microbes may activate regeneration of tadpole tails**

101 *Xenopus laevis* tadpoles can regenerate their tails up to metamorphosis, but temporarily lose this  
102 ability during the 'refractory period' from stages 45 to 47 *Beck et al. (2003)*. As ROS are required for  
103 successful tadpole tail regeneration, it was hypothesised that this refractory period could result  
104 from impaired ROS signalling. To see if acute exposure to exogenous ROS during the refractory  
105 period improved regeneration, tadpole tails were dipped in different concentrations of hydrogen  
106 peroxide (H<sub>2</sub>O<sub>2</sub>) after amputation at stage 46. Unexpectedly, the H<sub>2</sub>O<sub>2</sub> dip reduced, rather than  
107 enhanced, regeneration at concentrations of 3% and 0.3% (Fig.3a). Interestingly, the control tadpoles  
108 underwent equally good regeneration, which is not expected in the refractory period. This prompted  
109 a re-validation of the refractory period under current culture protocols. A clear refractory period  
110 was not consistently observed in all tadpole cohorts (data not shown).

111 The unexpected reduction in regeneration following H<sub>2</sub>O<sub>2</sub> treatment prompted a search for an  
112 explanation. The NF- $\kappa$ B activator, IKK, can be activated by the binding of ligands from microor-  
113 ganisms to toll-like receptors (TLR) *Chow et al. (1999)*. Lipopolysaccharides (LPS) are present on  
114 the surface of Gram-negative bacteria and bind to TLR4, eliciting activation of NF- $\kappa$ B via IKK *Chow*  
115 *et al. (1999)*. LPS which have been treated with H<sub>2</sub>O<sub>2</sub> no longer function as TLR4 ligands *Cherkin*  
116 *(1975)*. It was hypothesised that dipping tails in H<sub>2</sub>O<sub>2</sub> was inhibiting regeneration by disabling TLR  
117 ligands of bacteria around the wound, preventing TLR activation. In the absence of TLR activation,  
118 IKK may not be activated on amputation, potentially preventing NF- $\kappa$ B activity and the ROS burst  
119 being sustained.

120 To test this, heat-killed (HK) *Escherichia coli* (Gram-negative bacteria with surface LPS *Pradhan*  
121 *et al. (2012)*) were added following tail amputation and H<sub>2</sub>O<sub>2</sub> treatment (Fig 3a). Regeneration was  
122 greatly improved following addition of HK *E. coli*. Strikingly, tadpoles treated with 0.3% H<sub>2</sub>O<sub>2</sub> and HK  
123 *E. coli* had significantly better regeneration than the untreated controls. To see if H<sub>2</sub>O<sub>2</sub> treatment  
124 of tadpole skin, and not the wound itself, was sufficient to inhibit regeneration, stage 46 tadpoles  
125 were briefly immersed in H<sub>2</sub>O<sub>2</sub> prior to amputation (Fig 3b). Regeneration was significantly reduced  
126 with H<sub>2</sub>O<sub>2</sub> pre-treatment, consistent with the hypothesis that naturally occurring bacterial ligands  
127 on the skin surface have an important role in initiating regeneration. The reduction in regeneration  
128 with H<sub>2</sub>O<sub>2</sub> treatment varied between batches of tadpoles (data not shown), possibly due to varying  
129 bacterial loads.

130 To further test this hypothesis, tadpoles were raised with the broad spectrum antibiotic, gen-  
131 tamicin, to reduce the bacterial load on the skin (Fig 3c). Tadpoles raised with gentamicin had low  
132 regeneration scores after amputation at stage 46, which were significantly increased by addition

133 of HK *E. coli*. Interestingly, with added HK *E. coli*, the gentamicin treated tadpoles had significantly  
134 lower regeneration scores than their siblings raised without gentamicin. Gentamicin reduced the  
135 regenerative potential of tadpole tails, even with addition of HK *E. coli*, and this reduction was  
136 greater the earlier gentamicin treatment began (Fig 3d). Purified LPS also significantly improved  
137 regeneration of stage 46 tadpole tails (Fig 3e), as did the protein kinase C activator, prostratin (Fig  
138 3f), which activates IKK intracellularly, independent of TLRs *Williams et al. (2004)*. These results  
139 reveal the involvement of ligands binding to TLRs in the activation of regeneration, possibly through  
140 the IKK pathway.

## 141 Discussion

142 Regeneration of the *Xenopus* tadpole tail can be divided into three distinct phases: an early wound  
143 healing stage, which takes place from 0- 6h, an intermediate phase in which the regeneration  
144 bud is formed (around 24h) and a late phase, from 48h to 1 week, in which replacement of lost  
145 tissues is completed *Love et al. (2013)*; *Beck et al. (2009)*; *Ferreira et al. (2016)*. The importance of  
146 ROS, particularly H<sub>2</sub>O<sub>2</sub>, is increasingly being recognised as a critical factor influencing regenerative  
147 success *Chen et al. (2014)*. The production of ROS is the earliest known response to amputation,  
148 with detection possible within a few minutes and a gradient rapidly established which is thought  
149 to attract immune cells such as macrophages to the wound site *Love et al. (2013)*. Here, we show  
150 that NF- $\kappa$ B, a key regulator of the immune response, is rapidly translocated to the nucleus following  
151 tail amputation, and that the direct target *cox2* is also rapidly expressed at the wound surface. The  
152 apparent rapid activation of NF- $\kappa$ B not only provides a biochemical link between ROS production  
153 and the activation of the immune response, but also provides a possible mechanism for regulating  
154 continuous ROS production via a feedback loop. NF- $\kappa$ B targets include the NADPH oxidase genes  
155 and we show here that *nox2* (in macrophages) and *nox4* expression (in distal cells) are also rapidly  
156 upregulated. NF- $\kappa$ B may therefore play a role in modulating ROS levels, which others have shown  
157 to be critical for the active re-polarisation of bioelectric circuitry that contributes to regenerative  
158 outcomes *Ferreira et al. (2016)*.

159 While others have shown that physiological levels of exogenous H<sub>2</sub>O<sub>2</sub> applied in the first 24  
160 hours (but not if left on for the whole process) can improve refractory regeneration *Ferreira et al.*  
161 *(2016)*, here we show that brief exposure to higher levels of exogenous H<sub>2</sub>O<sub>2</sub> has the opposite effect,  
162 and that this can be rescued by heat killed Gram-negative bacteria (*E. coli*) or purified LPS, suggesting  
163 a role for Gram-negative tadpole skin microbiota in determining the outcome of tail regeneration in  
164 tadpoles from stage 45. LPS binds to TLRs, which can in turn activate NF- $\kappa$ B, but treatment with  
165 H<sub>2</sub>O<sub>2</sub> prevents this binding *Cherkin (1975)*. Gentamicin is a broad spectrum bacteriostatic antibiotic  
166 commonly used by researchers raising *Xenopus* embryos to reduce early deaths. The refractory  
167 period may therefore be revealed in a sterile laboratory environment. The refractory period ends at  
168 stage 48 which can only be reached in fed tadpoles, which are no longer in a sterile environment  
169 and so could regain regenerative capacity through TLR pathway activation.

170 TLR4 is limited to only a few cell types, including macrophages *Waltenbaugh et al. (2008)*, so TLR4  
171 would not be sufficient to activate NF- $\kappa$ B-mediated regeneration in other cell types. TLR4 pathway  
172 activation in macrophages leads to the production and release of pro-inflammatory cytokines  
173 including TNF and IL-1 *Zheng et al. (2012)* which have receptors on most cell types *Rothwell et al.*  
174 *(1997)*; *Dinarelli (1998)*; *Galeone et al. (2013)*. Binding of these cytokines to their respective cell-  
175 surface receptors leads to the activation of IKK *Hayden and Ghosh (2004)* and could consequently  
176 spread the activation signal to many cell types. TNF is important for skeletal muscle regeneration  
177 *Li and Schwartz (2001)*; *Warren et al. (2002)* and liver regeneration *Diehl et al. (1994, 1995)* and  
178 essential for zebrafish fin regeneration *Nguyen-Chi et al. (2017)*. The recruitment of macrophages  
179 may thereby be important for TLR-dependent regeneration. Interestingly, macrophage removal  
180 prevents regeneration of salamander limbs *Godwin et al. (2013)*. The regenerative competency of

181 pre-refractory tadpole tails, raised in a sterile environment *Beck et al. (2003)*, indicates that they  
182 must have an alternative, TLR-independent, and perhaps also IKK-independent, mechanism of  
183 regeneration. Reducing inflammatory cell migration does not prevent tail regeneration in stage 43  
184 (pre-refractory-equivalent) *Xenopus tropicalis* tadpoles *Love et al. (2013)*.

185 This study suggests a role for NF- $\kappa$ B in regeneration and a mechanism for its continual activity  
186 in blastemal cells through a positive-feedback loop involving Nox4 and ROS. A method to initiate  
187 this positive-feedback loop in human cells may have the potential to improve our regenerative  
188 capabilities.

## 189 **Methods and Materials**

### 190 **Animal ethics**

191 All animal experiments were approved by the University of Otago Animal Ethics Committee under  
192 protocol AEC56/12.

### 193 **Tail regeneration**

194 Tadpoles were raised in petri dishes (40-60 per dish) in 0.1 $\times$  Mark's modified Ringer's (MMR) at 24°C.  
195 They were divided evenly between treatment groups either before (when using pre-amputation  
196 treatment) or after amputation. A sharp scalpel blade was used to amputate 30% of the tail  
197 under MS222 (1/4000 w/v) anaesthesia (>stage 44) or no anaesthesia (<stage 45). Following any  
198 post-amputation treatment, each group of tadpoles was divided into at least three petri dishes.  
199 Tadpoles were kept at 24°C for 7 days with daily feedings of spirulina and 50% 0.1 $\times$  MMR changes.  
200 Regeneration was scored as follows: 0=no regeneration, 5=partial regeneration and 10=complete  
201 regeneration.

### 202 **Hindlimb regeneration**

203 Stage 51-55 tadpoles were anaesthetised with MS222 (Sigma, 1/4000 w/v) and placed on a moist-  
204 ened paper towel. One hindlimb was amputated using Vannas iridectomy scissors at the approxi-  
205 mate level of the knee. Tadpoles were transferred to dechlorinated water with air bubbled through  
206 an aeration stone. Tadpoles were kept in the aquarium at 25°C for the stated time (or for 1 month  
207 when regeneration was scored). Regeneration scores were assigned as follows: 0=stump, 0.5=spike,  
208 1-5=the number of regenerated digits.

### 209 **Heat killed *E. coli***

210 TOP10 *Escherichia coli* were grown in 10ml of Luria broth to stationary phase before centrifugation  
211 at 13,000 rpm and resuspension in 1 $\times$  PBS three times. They were then heated to 70°C for 1 h,  
212 centrifuged and resuspended in 2 mL of 0.1 $\times$  MMR. As indicated, the solution was added at a  
213 dilution of 1:100 in 0.1 $\times$  MMR for 1 h following amputation.

### 214 **H<sub>2</sub>O<sub>2</sub> dip**

215 Stage 46 tadpoles were anaesthetised with MS222 and tails were amputated using a sharp scalpel  
216 blade. Tadpoles were placed in 0.1 $\times$  MMR (MS222 and H<sub>2</sub>O<sub>2</sub> form a toxic product, so tadpoles must  
217 be removed from MS222 before H<sub>2</sub>O<sub>2</sub> dip) and individually sucked headfirst into an unmodified  
218 3 mL plastic pipette with tails projecting out the end. Tails were dipped in a H<sub>2</sub>O<sub>2</sub> solution for 3  
219 s and the tadpoles were placed in fresh 0.1 $\times$  MMR three times before being transferred to their  
220 post-H<sub>2</sub>O<sub>2</sub> treatments.

### 221 **H<sub>2</sub>O<sub>2</sub> immersion**

222 Stage 46 tadpoles were immersed in 0.3% H<sub>2</sub>O<sub>2</sub> in 0.1 $\times$  MMR for 2 m and transferred to fresh 0.1 $\times$   
223 MMR and anaesthetised with MS222 prior to tail amputation.

## 224 **DPI treatment**

225 Stage 43 tadpoles were treated with 2  $\mu\text{M}$  diphenyleiodonium chloride (DPI; Sigma; 2 mM in  
226 DMSO stock) or 0.1% DMSO (in 0.1 $\times$  MMR) for 1 h before and 1, 3, 6 or 12 h after tail amputation.

## 227 **LPS and prostratin treatments**

228 Stage 46 tadpoles (raised at a low density of approx. 40 per dish) were anaesthetised with MS222  
229 and tails were amputated using a sharp scalpel blade. Tadpoles were treated with 50  $\mu\text{g}\cdot\text{mL}^{-1}$   
230 lipopolysaccharides (LPS) from *E coli* 0111:B4 purified by phenol extraction (Sigma; 5  $\text{mg}\cdot\text{L}^{-1}$  in water  
231 stock) with untreated control for 1 h, or 10  $\mu\text{M}$  prostratin (Sigma; 4  $\text{mg}\cdot\text{mL}^{-1}$  in ethanol stock) with  
232 0.1% ethanol control, for 40 m.

## 233 **Gentamicin treatment**

234 In summary, tadpoles used for gentamicin experiments were raised at 17°C and placed in petri  
235 dishes (40-60 per dish) containing 100  $\mu\text{g}\cdot\text{L}^{-1}$  gentamicin in 0.1 $\times$  MMR from the stage indicated, or if  
236 no stage is indicated from just after the embryos were sorted at stage 2-6. Embryos were moved to  
237 new petri dishes containing fresh gentamicin every two days. Following amputation, tadpoles were  
238 incubated at 24°C and remained in gentamicin for a further day.

## 239 **Cytoplasmic and nuclear protein extractions and Western blots**

240 Stage 55 tadpole tails (four per timepoint) were amputated (approx. 40% of tail length) with a  
241 sharp scalpel blade under MS222 anaesthesia. After 0, 1, 3 or 6 h, tadpoles were re-anaesthetised  
242 and a further 3 mm (20% of the remaining tail) was amputated. For DPI treatment, tadpoles  
243 were incubated with 2  $\mu\text{M}$  DP1 (0.1% DMSO) for 1 h prior to the first amputation until the second  
244 amputation. The four 3 mm sections for each timepoint and treatment were homogenised in a  
245 bead beater with CER I (NE-PER) reagent, Halt protease inhibitor cocktail (Thermo Fisher) and EDTA.  
246 Cytoplasmic and nuclear protein fractions were extracted using NE-PER Nuclear and Cytoplasmic  
247 Extraction Reagents (Thermo Fisher) following the manufacturer's protocol. Nuclear extracts were  
248 diluted 1:1 with PBS. Samples were prepared with sample loading buffer and heated to 100°C for 3  
249 m. The samples (10  $\mu\text{L}$ ) were run on 12.5% SDS-PAGE gels along with a Precision Plus Protein dual  
250 colour standard (Bio-Rad) and transferred to PVDF membranes. The membranes were blocked with  
251 2% BSA in PBS/tween (25 m) and incubated with 1:200 rabbit-anti NF- $\kappa$ B p65 polyclonal antibody  
252 (Pierce) (2 h) and 1:5000 Goat anti-rabbit IgG (H+L)-HRP conjugate (Bio-Rad) (1 h). Reactivity was  
253 detected with Clarity Western ECL Substrate (Bio-Rad).

## 254 **Whole mount *in situ* hybridisation**

255 *Coding regions of cox2 (primers: 5' gctctagaatgatcgactaccgcg, 3' cggtaccttaagttcggatgtgtgc), nox1*  
256 *(primers: 5' tcctgtttccagggcagtg, 3' agattggacgccatagctg), nox2 (primers: 5' ctatgacgagggcgaagcat, 3'*  
257 *tcatccagccagtgaggtg) and nox4 (primers: 5' taggcaggaatccagtgatgg, 3' cactcccgaacagaagtga) were*  
258 *amplified from stage 12 X. laevis embryo cDNA using Pwo DNA Polymerase (Roche) and ligated*  
259 *into the TOPO Cloning site of the Pcr4-TOPO plasmid (Invitrogen Life Technologies). Insertions*  
260 *were verified by DNA sequencing. Plasmids were linearised with NotI and digoxigenin-labelled*  
261 *RNA probes were transcribed using T3 polymerase with a DIG-NTP mix (Roche). Templates were*  
262 *removed using DNase I (Roche) and the probes were precipitated with 2.5 M LiCl. Whole-mount *in**  
263 *situ hybridisations were performed as previously described in Pearl et al (12).*

## 264 **Acknowledgments**

265 We would like to thank Adam Middleton and Robert Day for comments on the manuscript and  
266 Esther Pearl for prior cloning of *X.laevis Cox2*. TFB was supported by a University of Otago PhD  
267 studentship.

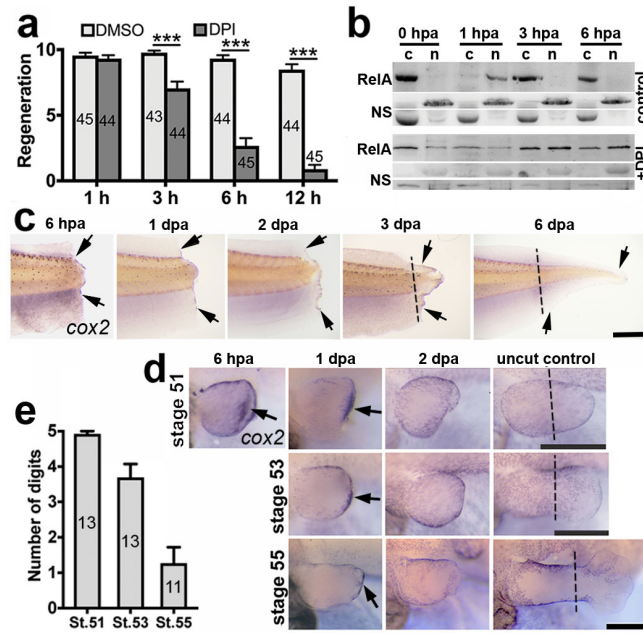

**Figure 1. *Nox* and  $\text{NF-}\kappa\text{B}$  are active within hours after amputation.** **a**, Mean tail regeneration scores + s.e.m of stage 43 tadpoles treated with DPI or DMSO control for 1 h before amputation and the indicated hpa. Sample numbers are indicated inside bars.  $p$  values are based on ordinal logistic regressions: \*\*\*  $p < 0.001$ . **b**, Western blots showing RelA in cytoplasmic C and nuclear N protein fractions from tail sections at indicated hpa  $\pm$  DPI. Non-specific NS bands are included as loading controls. **c-d**, *In situ* hybridisations, using a *cox2* probe, of amputated tails (**c**) and hindlimbs (**d**). The stage at amputation and fixation times (hpa/dpa) are labelled. Black arrows indicate staining and dashed lines indicate the amputation planes in unamputated controls. Scale bars: 500  $\mu\text{m}$ . **e**, Mean regeneration scores of hindlimbs amputated at the indicated stages + s.e.m. with sample numbers indicated inside bars. Data for graphs a and e can be found in supplemental file S1.

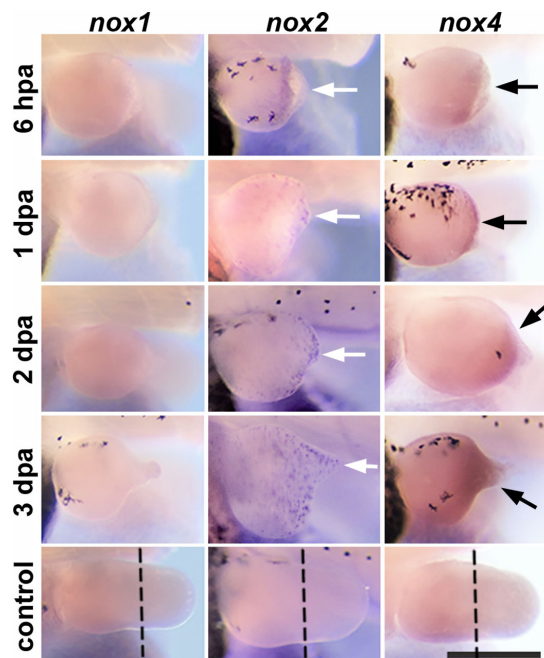

**Figure 2. *nox2* and *nox4* are expressed in regenerating hindlimbs.** *In situ* hybridisations, using indicated probes, of amputated stage 51 tadpole hindlimbs. Fixation times (hpa/dpa) are labelled. White arrows indicate punctate staining, black arrows indicated continuous staining and dashed lines indicate the amputation planes in unamputated controls. Scale bar: 500  $\mu\text{m}$ .

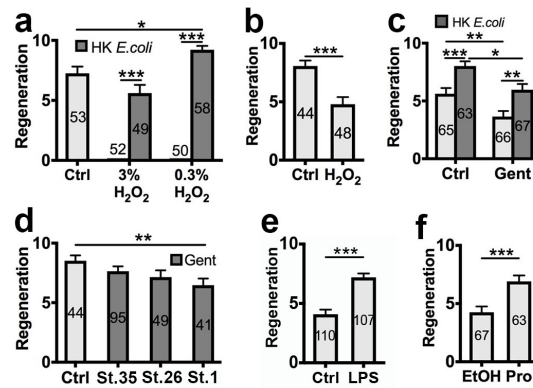

**Figure 3. Regeneration is activated by bacterial ligands.** Mean regeneration scores + s.e.m. of stage 46 tadpoles: **a**, with amputated tails dipped in the indicated concentration of H<sub>2</sub>O<sub>2</sub> ± HK *E. coli* and untreated control; **b**, immersed in 0.3% H<sub>2</sub>O<sub>2</sub> prior to tail amputation and untreated control; **c**, raised with or without gentamicin prior to tail amputation ± HK *E. coli*; **d**, raised with gentamicin beginning at the indicated developmental stage before tail amputation + HK *E. coli*; **e**, with tails amputated ± LPS; **f**, with tails amputated + prostratin or ethanol control. Sample numbers are indicated inside bars. *p* values are based on ordinal logistic regressions: \* *p* < 0.05, \*\* *p* < 0.01, \*\*\* *p* < 0.001. Data for graphs can be found in supplemental file S1.

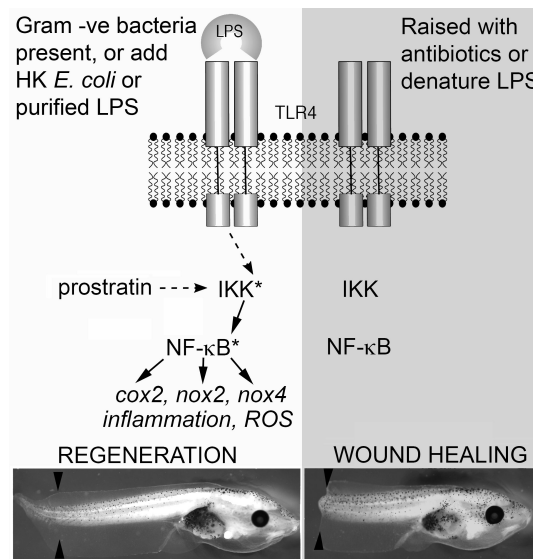

**Figure 4. Proposed mechanism for how bacteria influence the outcome of regeneration following partial tadpole tail amputation.** On the left side, regeneration is favoured when native microbiota are present (on the tadpole's skin or in the media) or if heat killed *E. coli* or purified LPS are added to the media. The small molecule prostratin can mimic this by indirectly activating IKK. Downstream targets of NF-κB could act to activate an inflammatory response and propagate the ROS signal reported by *Love et al. (2013)*. On the right side, raising tadpoles in the antibiotic gentamicin, or treating tadpoles with H<sub>2</sub>O<sub>2</sub> to denature LPS arising from native microbiota leads to a wound healing response. Asterisk denotes activated protein. Black arrowheads indicate the site of amputation at stage 46, representative tadpoles are shown 5 days after amputation.



## References

- 268  
269 **Beck CW**, Christen B, Slack JM. Molecular pathways needed for regeneration of spinal cord and muscle in a  
270 vertebrate. *Dev Cell*. 2003; 5(3):429–39. <https://www.ncbi.nlm.nih.gov/pubmed/12967562>.
- 271 **Beck CW**, Izipisua Belmonte JC, Christen B. Beyond early development: *Xenopus* as an emerging model for the  
272 study of regenerative mechanisms. *Dev Dyn*. 2009; 238(6):1226–48. <https://www.ncbi.nlm.nih.gov/pubmed/19280606>, doi: 10.1002/dvdy.21890.
- 274 **Chang J**, Liu F, Lee M, Wu B, Ting K, Zara JN, Soo C, Al Hezaimi K, Zou W, Chen X, Mooney DJ, Wang CY. NF-  
275 kappaB inhibits osteogenic differentiation of mesenchymal stem cells by promoting beta-catenin degradation.  
276 *Proc Natl Acad Sci U S A*. 2013; 110(23):9469–74. <https://www.ncbi.nlm.nih.gov/pubmed/23690607>, doi:  
277 10.1073/pnas.1300532110.
- 278 **Chen Y**, Love NR, Amaya E. Tadpole tail regeneration in *Xenopus*. *Biochem Soc Trans*. 2014; 42(3):617–23.  
279 <https://www.ncbi.nlm.nih.gov/pubmed/24849228>, doi: 10.1042/BST20140061.
- 280 **Cherkin A**. Destruction of bacterial endotoxin pyrogenicity by hydrogen peroxide. *Immunochemistry*. 1975;  
281 12(6-7):625–7. <https://www.ncbi.nlm.nih.gov/pubmed/1102442>.
- 282 **Chow JC**, Young DW, Golenbock DT, Christ WJ, Gusovsky F. Toll-like receptor-4 mediates lipopolysaccharide-  
283 induced signal transduction. *J Biol Chem*. 1999; 274(16):10689–92. <https://www.ncbi.nlm.nih.gov/pubmed/10196138>.
- 285 **Deng P**, Zhou C, Alvarez R, Hong C, Wang CY. Inhibition of IKK/NF-kappaB Signaling Enhances Differentiation  
286 of Mesenchymal Stromal Cells from Human Embryonic Stem Cells. *Stem Cell Reports*. 2016; 6(4):456–465.  
287 <https://www.ncbi.nlm.nih.gov/pubmed/26972683>, doi: 10.1016/j.stemcr.2016.02.006.
- 288 **Dent JN**. Limb regeneration in larvae and metamorphosing individuals of the South African clawed toad. *J*  
289 *Morphol*. 1962; 110:61–77. <https://www.ncbi.nlm.nih.gov/pubmed/13885494>, doi: 10.1002/jmor.1051100105.
- 290 **Diehl AM**, Yang SQ, Yin M, Lin HZ, Nelson S, Bagby G. Tumor necrosis factor-alpha modulates CCAAT/enhancer  
291 binding proteins-DNA binding activities and promotes hepatocyte-specific gene expression during liver  
292 regeneration. *Hepatology*. 1995; 22(1):252–61. <https://www.ncbi.nlm.nih.gov/pubmed/7601419>.
- 293 **Diehl AM**, Yin M, Fleckenstein J, Yang SQ, Lin HZ, Brenner DA, Westwick J, Bagby G, Nelson S. Tumor necrosis  
294 factor-alpha induces c-jun during the regenerative response to liver injury. *Am J Physiol*. 1994; 267(4 Pt  
295 1):G552–61. <https://www.ncbi.nlm.nih.gov/pubmed/7943321>, doi: 10.1152/ajpgi.1994.267.4.G552.
- 296 **Dinarello CA**. Interleukin-1, interleukin-1 receptors and interleukin-1 receptor antagonist. *Int Rev Immunol*.  
297 1998; 16(5-6):457–99. <https://www.ncbi.nlm.nih.gov/pubmed/9646173>, doi: 10.3109/08830189809043005.
- 298 **Ferreira F**, Luxardi G, Reid B, Zhao M. Early bioelectric activities mediate redox-modulated regeneration. *Develop-*  
299 *ment*. 2016; 143(24):4582–4594. <https://www.ncbi.nlm.nih.gov/pubmed/27827821>, doi: 10.1242/dev.142034.
- 300 **Galeone A**, Paparella D, Colucci S, Grano M, Brunetti G. The role of TNF-alpha and TNF superfamily members  
301 in the pathogenesis of calcific aortic valvular disease. *ScientificWorldJournal*. 2013; 2013:875363. <https://www.ncbi.nlm.nih.gov/pubmed/24307884>, doi: 10.1155/2013/875363.
- 303 **Godwin JW**, Pinto AR, Rosenthal NA. Macrophages are required for adult salamander limb regeneration.  
304 *Proc Natl Acad Sci U S A*. 2013; 110(23):9415–20. <https://www.ncbi.nlm.nih.gov/pubmed/23690624>, doi:  
305 10.1073/pnas.1300290110.
- 306 **Hayden MS**, Ghosh S. Signaling to NF-kappaB. *Genes Dev*. 2004; 18(18):2195–224. <https://www.ncbi.nlm.nih.gov/pubmed/15371334>, doi: 10.1101/gad.1228704.
- 308 **Li YP**, Schwartz RJ. TNF-alpha regulates early differentiation of C2C12 myoblasts in an autocrine fashion. *FASEB*  
309 *J*. 2001; 15(8):1413–5. <https://www.ncbi.nlm.nih.gov/pubmed/11387241>.
- 310 **Lim JW**, Kim H, Kim KH. Nuclear factor-kappaB regulates cyclooxygenase-2 expression and cell proliferation in  
311 human gastric cancer cells. *Lab Invest*. 2001; 81(3):349–60. <https://www.ncbi.nlm.nih.gov/pubmed/11310828>.
- 312 **Love NR**, Chen Y, Ishibashi S, Kritsiligkou P, Lea R, Koh Y, Gallop JL, Dorey K, Amaya E. Amputation-induced  
313 reactive oxygen species are required for successful *Xenopus* tadpole tail regeneration. *Nat Cell Biol*. 2013;  
314 15(2):222–8. <https://www.ncbi.nlm.nih.gov/pubmed/23314862>, doi: 10.1038/ncb2659.

- 315 **Manea A**, Tanase LI, Raicu M, Simionescu M. Transcriptional regulation of NADPH oxidase isoforms, Nox1 and  
316 Nox4, by nuclear factor-kappaB in human aortic smooth muscle cells. *Biochem Biophys Res Commun.* 2010;  
317 396(4):901–7. <https://www.ncbi.nlm.nih.gov/pubmed/20457132>, doi: 10.1016/j.bbrc.2010.05.019.
- 318 **Mescher AL**, Neff AW, King MW. Changes in the inflammatory response to injury and its resolution during  
319 the loss of regenerative capacity in developing *Xenopus* limbs. *PLoS One.* 2013; 8(11):e80477. <https://www.ncbi.nlm.nih.gov/pubmed/24278286>, doi: 10.1371/journal.pone.0080477.
- 320  
321 **Miller AA**, Drummond GR, Sobey CG. Novel isoforms of NADPH-oxidase in cerebral vascular con-  
322 trol. *Pharmacol Ther.* 2006; 111(3):928–48. <https://www.ncbi.nlm.nih.gov/pubmed/16616784>, doi:  
323 10.1016/j.pharmthera.2006.02.005.
- 324 **Morgan MJ**, Liu ZG. Crosstalk of reactive oxygen species and NF-kappaB signaling. *Cell Res.* 2011; 21(1):103–15.  
325 <https://www.ncbi.nlm.nih.gov/pubmed/21187859>, doi: 10.1038/cr.2010.178.
- 326 **Nguyen-Chi M**, Laplace-Builhe B, Travnickova J, Luz-Crawford P, Tejedor G, Lutfalla G, Kissa K, Jorgensen C,  
327 Djouad F. TNF signaling and macrophages govern fin regeneration in zebrafish larvae. *Cell Death Dis.* 2017;  
328 8(8):e2979. <https://www.ncbi.nlm.nih.gov/pubmed/28796253>, doi: 10.1038/cddis.2017.374.
- 329 **Pearl EJ**, Barker D, Day RC, Beck CW. Identification of genes associated with regenerative success of *Xeno-*  
330 *pus laevis* hindlimbs. *BMC Dev Biol.* 2008; 8:66. <https://www.ncbi.nlm.nih.gov/pubmed/18570684>, doi:  
331 10.1186/1471-213X-8-66.
- 332 **Pradhan A**, Khalaf H, Ochsner SA, Sreenivasan R, Koskinen J, Karlsson M, Karlsson J, McKenna NJ, Orban L,  
333 Olsson PE. Activation of NF-kappaB protein prevents the transition from juvenile ovary to testis and promotes  
334 ovarian development in zebrafish. *J Biol Chem.* 2012; 287(45):37926–38. <https://www.ncbi.nlm.nih.gov/pubmed/22988238>, doi: 10.1074/jbc.M112.386284.
- 335  
336 **Reuter S**, Gupta SC, Chaturvedi MM, Aggarwal BB. Oxidative stress, inflammation, and cancer: how are they  
337 linked? *Free Radic Biol Med.* 2010; 49(11):1603–16. <https://www.ncbi.nlm.nih.gov/pubmed/20840865>, doi:  
338 10.1016/j.freeradbiomed.2010.09.006.
- 339 **Rothwell N**, Allan S, Toulmond S. The role of interleukin 1 in acute neurodegeneration and stroke: pathophysi-  
340 ological and therapeutic implications. *J Clin Invest.* 1997; 100(11):2648–52. <https://www.ncbi.nlm.nih.gov/pubmed/9389726>, doi: 10.1172/JCI119808.
- 341  
342 **Sun Z**, Andersson R. NF-kappaB activation and inhibition: a review. *Shock.* 2002; 18(2):99–106. [https://www.](https://www.ncbi.nlm.nih.gov/pubmed/12166787)  
343 [ncbi.nlm.nih.gov/pubmed/12166787](https://www.ncbi.nlm.nih.gov/pubmed/12166787).
- 344 **Takase O**, Yoshikawa M, Idei M, Hirahashi J, Fujita T, Takato T, Isagawa T, Nagae G, Suemori H, Aburatani  
345 H, Hishikawa K. The role of NF-kappaB signaling in the maintenance of pluripotency of human induced  
346 pluripotent stem cells. *PLoS One.* 2013; 8(2):e56399. <https://www.ncbi.nlm.nih.gov/pubmed/23437124>, doi:  
347 10.1371/journal.pone.0056399.
- 348 **Waltenbaugh C**, Doan T, Melvoid R, Viselli S. *Immunology.* Lippincott's Illustrated Reviews. 2008; p. 17.
- 349 **Warren GL**, Hulderman T, Jensen N, McKinstry M, Mishra M, Luster MI, Simeonova PP. Physiological role of  
350 tumor necrosis factor alpha in traumatic muscle injury. *FASEB J.* 2002; 16(12):1630–2. [https://www.ncbi.nlm.](https://www.ncbi.nlm.nih.gov/pubmed/12207010)  
351 [nih.gov/pubmed/12207010](https://www.ncbi.nlm.nih.gov/pubmed/12207010), doi: 10.1096/fj.02-0187fje.
- 352 **Williams SA**, Chen LF, Kwon H, Fenard D, Bisgrove D, Verdin E, Greene WC. Prostratin antagonizes HIV latency by  
353 activating NF-kappaB. *J Biol Chem.* 2004; 279(40):42008–17. <https://www.ncbi.nlm.nih.gov/pubmed/15284245>,  
354 doi: 10.1074/jbc.M402124200.
- 355 **Zheng W**, Zheng X, Liu S, Ouyang H, Levitt RC, Candiotti KA, Hao S. TNFalpha and IL-1beta are mediated by both  
356 TLR4 and Nod1 pathways in the cultured HAPI cells stimulated by LPS. *Biochem Biophys Res Commun.* 2012;  
357 420(4):762–7. <https://www.ncbi.nlm.nih.gov/pubmed/22450316>, doi: 10.1016/j.bbrc.2012.03.068.
